# Supplementary material for: The single-molecule electrical conductance of a rotaxane-hexayne supramolecular assembly
Source: Royal Society of Chemistry journal article supplement (doi:10.1039/c6nr06355a), 2016-11-29
Supplement: c6nr06355a1.pdf [file c6nr06355a1.pdf]

## Supporting Information for

### The Single-Molecule Electrical Conductance of a Rotaxane-Hexayne Supramolecular Assembly

David C. Milan,<sup>[a,#]</sup> Maximilian Krempe,<sup>[b,#]</sup> Ali K. Ismael,<sup>[c,d,#]</sup> Levon D. Movsisyan,<sup>[e,#]</sup> Michael Franz,<sup>[b,#]</sup> Iain Grace,<sup>[c]</sup> Richard J. Brooke,<sup>[f]</sup> Walther Schwarzacher,<sup>[f]</sup> Simon J. Higgins,<sup>[a,\*]</sup> Harry L. Anderson,<sup>[e,\*]</sup> Colin J. Lambert,<sup>[c,\*]</sup> Rik R. Tykwinski,<sup>[b,\*]</sup> Richard J. Nichols,<sup>[a,\*]</sup>

<sup>a</sup> Department of Chemistry, University of Liverpool, Crown St, Liverpool, L69 7ZD, United Kingdom

<sup>b</sup> Department of Chemistry and Pharmacy & Interdisciplinary Center for Molecular Materials (ICMM), University of Erlangen-Nürnberg (FAU), Henkestrasse 42, 91054 Erlangen, Germany

<sup>c</sup> Department of Physics, University of Lancaster, Lancaster, LA1 4YB, U.K.

<sup>d</sup> Department of Physics, College of Education for Pure Science, Tikrit University, Tikrit, Iraq

<sup>e</sup> Department of Chemistry, University of Oxford, Chemistry Research Laboratory, Oxford, OX1 3TA, United Kingdom

<sup>f</sup> H. H. Wills Physics Laboratory, University of Bristol, Tyndall Avenue, Bristol BS8 1TL, United Kingdom

# These authors contributed equally to this work.

\* Contact these author for correspondence

#### Table of Contents

1. Binding energy of Rotaxane and Dumbbell on gold
2. Transmission coefficient as a function of shifting the macrocycle along the dumbbell
3. Frontier orbitals
4. Synthesis and characterization
5. NMR spectra (<sup>1</sup>H and <sup>13</sup>C) of the naked wire, macrocycle, and rotaxane.

## 1. Binding distance of Rotaxane and Dumbbell on a gold surface

To calculate the optimum binding distance for **3** and **3·M1** between two Au(111) surfaces we use DFT and the counterpoise method, which removes basis set superposition errors (BSSE). The binding distance  $d$  is defined as the distance between the gold surface and the nitrogen atom of the pyridyl group. Here molecule **3·M1** or **3** are defined as entity A and the gold electrodes as entity B.

The ground state energy of the total system is calculated using SIESTA and is denoted  $E_{AB}^{AB}$ , with the DFT parameters defined as those in the method section of the main text. Here the gold leads consist of 3 layers of 25 atoms. The energy of each entity is then calculated in a fixed basis, which is achieved through the use of ghost atoms in SIESTA. Hence the energy of the individual **3·M1** or **3** molecules in the presence of the fixed basis is defined as  $E_A^{AB}$  and for the gold as  $E_B^{AB}$ . The binding energy is then calculated using the following equation:

$$\text{Binding Energy} = E_{AB}^{AB} - E_A^{AB} - E_B^{AB} \quad (\text{S1})$$

Fig. **S1** shows that for the optimum binding distance  $d$  is 2.4 Å for both molecules and the binding energy is approximately 0.35 eV.

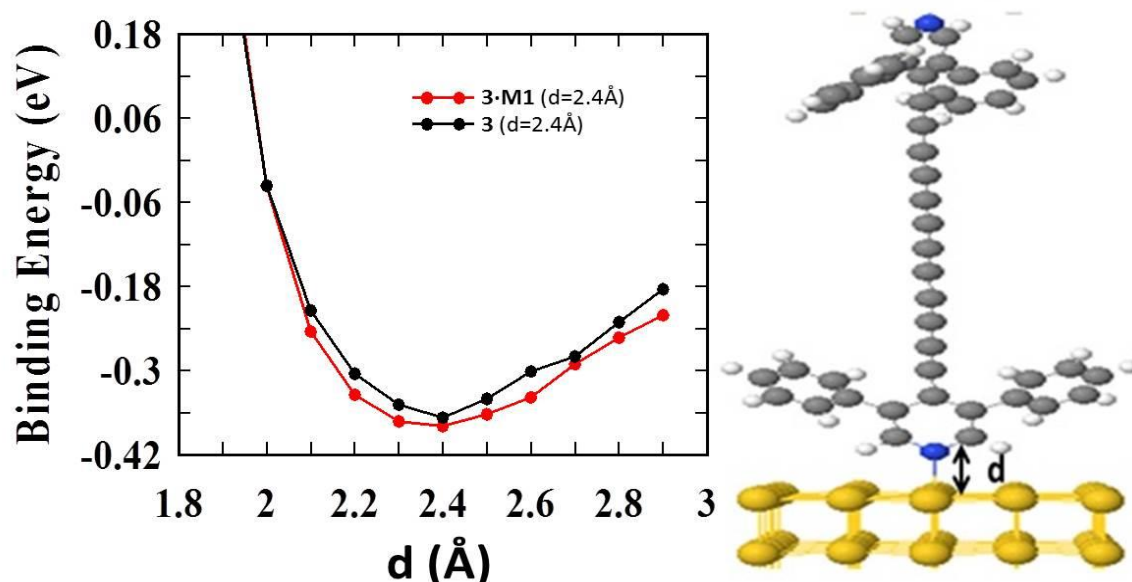

**Figure S1.** Binding energy of **3·M1** and **3** on a gold surface. Right panel: Orientation of **3** with respect to the gold leads.

## 2. Transmission coefficient as a function of macrocycle position and orientation along the dumbbell

We next investigate the effect of the position and orientation of the rotaxane ring along the axis. Fig. **S2** shows the effect of shifting the macrocycle along the length of **3**, starting from one end and progressively moving to the other, (i.e., from  $z = +3 \text{ \AA}$  to  $-3 \text{ \AA}$  along **3**, where  $z = 0$  corresponds to half way along the oligoyne chain). The transmission curves show that there is a strong interaction between the 2,6-phenyl substituents of the pyridyl groups and the macrocycle only at  $z = \pm 3 \text{ \AA}$  (i.e., where the transmission curves are significantly altered). This only changes the transmission close to the HOMO resonances, which is well away from the Fermi energy.

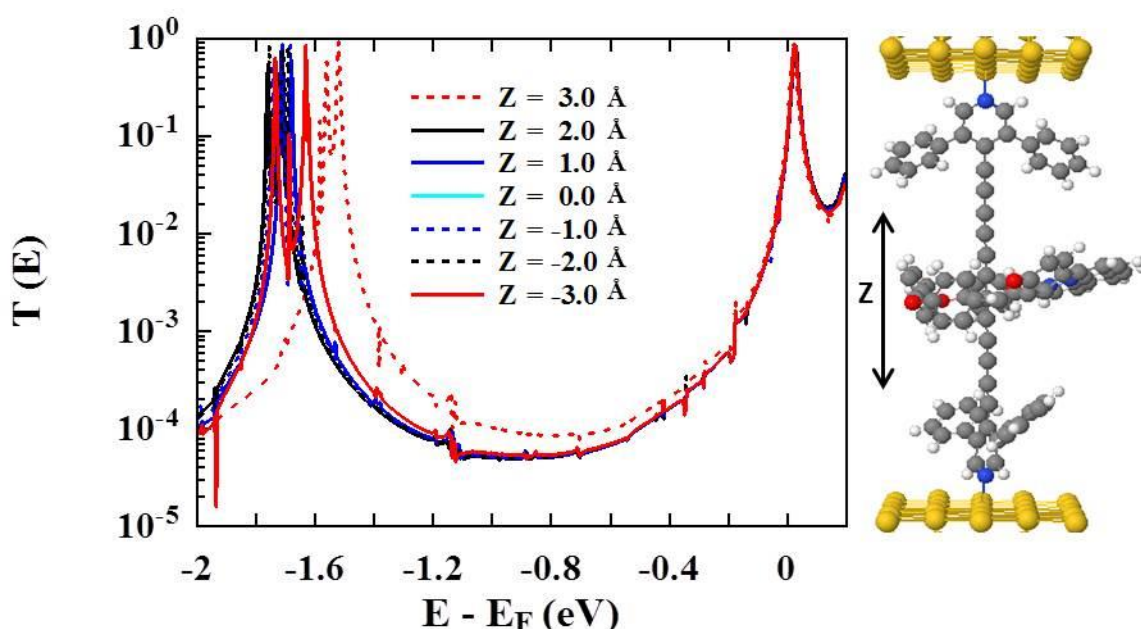

**Figure S2.** Transmission coefficient as a function of shifting the **3-M1** ring along the **3**. Transmission curves,  $T(E)$ , for seven different positions (ends when the ring is close to the anchor groups, 0 when the ring is in the middle).

Figure **S3** shows the effect of shifting the orientation of the macrocycle around **3** for  $\theta = 0^\circ$  and  $300^\circ$  at  $z = 0$ , and it can be seen that there is no effect due to the rotation.

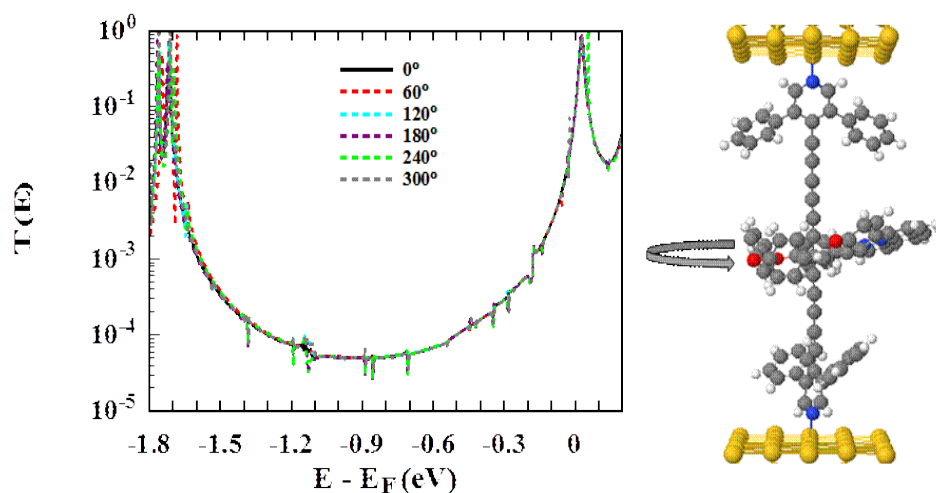

**Figure S3.** Transmission coefficient as a function of orientation. Zero bias transmission coefficient  $T(E)$  versus electron energy  $E$  for rotation angles  $\theta$  between  $0^\circ$  and  $300^\circ$  of the the rotaxane ring with respect to the **3**.

### 3. Frontier Orbitals

Plots of the frontier orbitals of **3** and **3·M1** are shown in Figures **S4** and **S5**. The results show that for **3·M1**, orbitals from HOMO to HOMO-4 inclusive are localised on the ring, while the HOMO-5 orbital has a similar energy to the HOMO of isolated **3** and is localised along the oligoyne backbone.

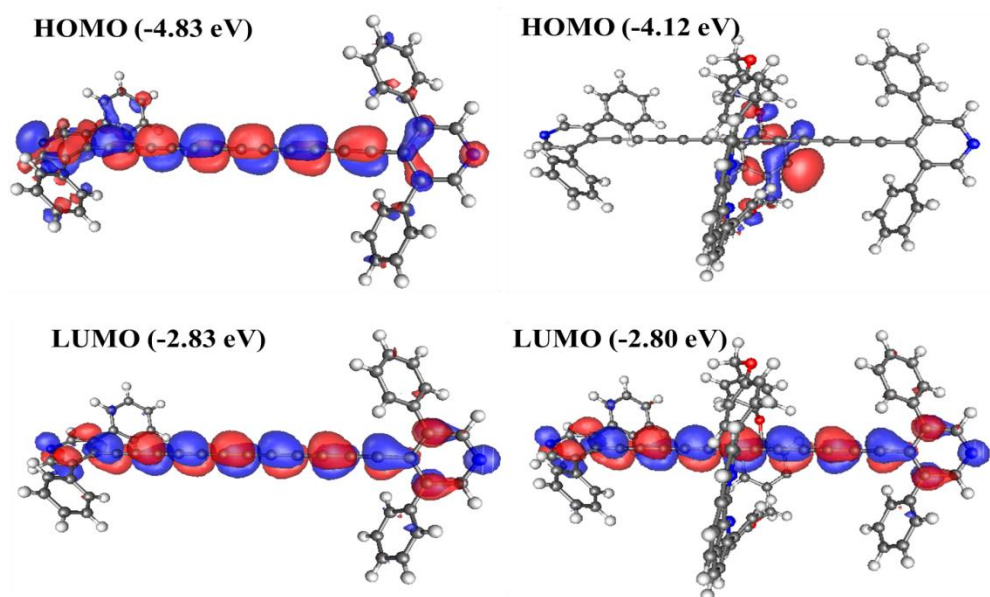

**Figure S4.** HOMO and LUMO orbitals of (left) **3** and (right) **3·M1**.

HOMO-1 (-4.26 eV)

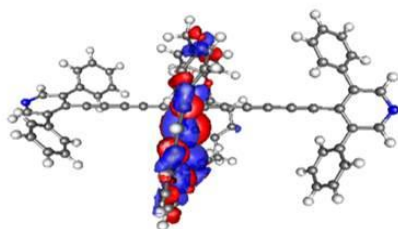

HOMO-3 (-4.60 eV)

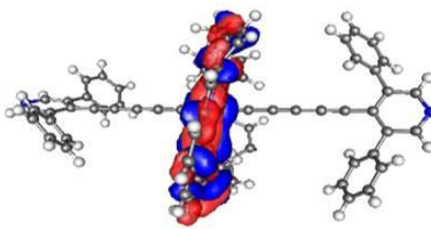

HOMO-2 (-4.44 eV)

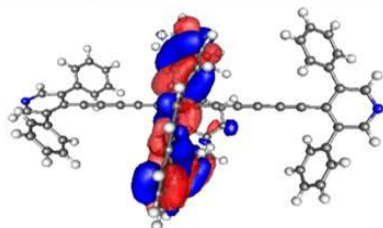

HOMO-4 (-4.65 eV)

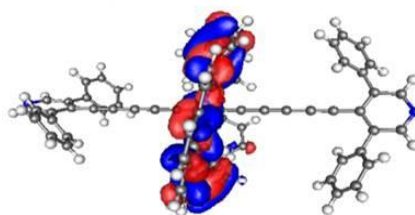

HOMO - 5 (-4.78 eV)

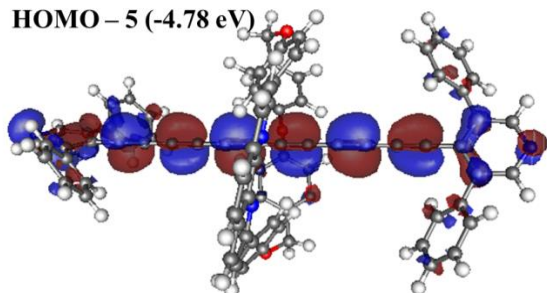

**Figure S5.** HOMO orbitals of the **3-M1**.

## 4. Synthesis and characterization

### General procedures and methods:

Reagent grade chemicals were purchased from commercial suppliers and used without further purification. THF was distilled from sodium/benzophenone. CH<sub>3</sub>CN and CH<sub>2</sub>Cl<sub>2</sub> were distilled from CaH<sub>2</sub>. MgSO<sub>4</sub> was used as the drying reagent after aqueous workup. <sup>1</sup>H and <sup>13</sup>C NMR spectra were recorded on a Bruker AVII 500 at 500 MHz (<sup>1</sup>H NMR) and 126 MHz (<sup>13</sup>C NMR). NMR spectra were referenced to the residual solvent signal (<sup>1</sup>H CD<sub>2</sub>Cl<sub>2</sub>: 5.32 ppm; <sup>13</sup>C CD<sub>2</sub>Cl<sub>2</sub>: 53.8 ppm) and recorded at ambient probe temperature. For simplicity, the coupling constants of the aryl protons for *para*-substituted aryl groups have been reported as pseudo first-order (i.e., doublets), even though they are second-order (AA'XX') spin systems. UV-vis measurements were carried out on a Varian Cary 5000 UV-Vis-NIR spectrophotometer at rt. Mass spectra were obtained from a Bruker maxis 4G. IR spectra were recorded on a Varian 660-IR spectrometer as solids in ATR-mode. Differential scanning calorimetry (DSC) measurements were made on a Mettler Toledo TGA/STDA 851e/1100/SF. Melting points were measured with an Electrothermal 9100 instrument. TLC analyses were carried out on TLC plates from Macherey-Nagel (ALUGRAM® SIL G/UV254) and visualized via UV-light (264/364 nm) or standard coloring reagents. Column chromatography was performed using Silica Gel 60M (Merck).

Triynes **1a** and **1b**,<sup>i</sup> and macrocycle **M1**<sup>ii</sup> were synthesized according to literature protocols.<sup>iii</sup>

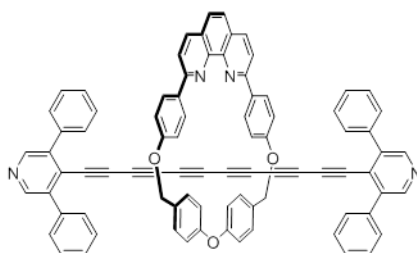

**3•M1 from triyne 1a.** TBAF (1.0 M in THF, 0.12 mL, 0.12 mmol) was added dropwise to a solution of **1a** (50 mg, 0.11 mmol) in wet THF (10 mL, and 0.05 mL of H<sub>2</sub>O). The mixture was stirred at rt for 10 min, quenched via the addition of satd aq NH<sub>4</sub>Cl (10 mL), and extracted with CH<sub>2</sub>Cl<sub>2</sub> (2 × 10 mL). The combined organic phases were washed with H<sub>2</sub>O (10 mL) and satd aq NaCl (10 mL). The solvent was reduced in vacuo to ca. 5 mL, and the mixture filtered through a plug of Al<sub>2</sub>O<sub>3</sub> (EtOAc ca. 150 mL). The solution was concentrated under reduced pressure to ca. 3 mL. THF (5 mL) was added and the solution was concentrated to three mL. This procedure was repeated three times to displace as much of the EtOAc as possible, ultimately giving a solution of terminal triyne in THF (8 mL), which was used without further purification. In a separate flask, CuI (9.5 mg, 0.050 mmol) in CH<sub>3</sub>CN (2 mL) was added to a solution of macrocycle **M1** (28 mg, 0.050 mmol) in CH<sub>2</sub>Cl<sub>2</sub> (2 mL) and the mixture was stirred at rt for 1 h. The solvent was removed in vacuo and the residue dissolved in THF (3 mL). The terminal triyne in THF, as prepared above, K<sub>2</sub>CO<sub>3</sub> (27 mg, 0.20 mmol), and I<sub>2</sub> (13 mg, 0.050 mmol) were added to the solution of the Cu-macrocycle complex **M1•CuI**. The reaction mixture was stirred at 60 °C for 24 h, cooled to rt, and quenched via the addition of CH<sub>2</sub>Cl<sub>2</sub> (1 mL), CH<sub>3</sub>CN (1 mL), and KCN (20 mg in 1 mL H<sub>2</sub>O). After stirring for 2 h, the organic phase was separated, the aqueous phase extracted with CH<sub>2</sub>Cl<sub>2</sub> (2 × 10 mL), and the combined organic phases were washed with H<sub>2</sub>O (10 mL) and satd aq NaCl (10 mL). The solvent was removed in vacuo and column chromatography (Al<sub>2</sub>O<sub>3</sub>, hexane/EtOAc 4:1) afforded **3•M1** (1 mg, 2%) as a yellow solid.

**3•M1 from triyne 1b.** CsF (34 mg, 0.22 mmol) was added to a solution of **1b** (85 mg, 0.20 mmol) in wet THF (10 mL, 0.25 mL H<sub>2</sub>O). The mixture was stirred at rt for 30 min, quenched via the addition of satd aq NH<sub>4</sub>Cl (10 mL), and extracted with CH<sub>2</sub>Cl<sub>2</sub> (2 × 25 mL). The combined organic phases were washed with H<sub>2</sub>O (10 mL) and satd aq NaCl (10 mL), and dried (MgSO<sub>4</sub>). The solution was concentrated under reduced pressure to ca. 5 mL. THF (10 mL) was added and the solution was concentrated to 5 mL. This procedure was repeated three times to displace as much CH<sub>2</sub>Cl<sub>2</sub> as possible, ultimately giving a solution of terminal triyne in THF (10 mL). In a separate flask, CuI (14 mg, 0.072 mmol) in CH<sub>3</sub>CN (3 mL) was added to a solution of macrocycle **M1** (40 mg, 0.072 mmol) in CH<sub>2</sub>Cl<sub>2</sub> (3 mL) and the mixture was stirred at rt for 1 h. The solvent was removed in vacuo and the

residue dissolved in THF (6 mL). The terminal triyne in THF, as prepared above,  $K_2CO_3$  (40 mg, 0.29 mmol), and  $I_2$  (22 mg, 0.086 mmol) were added to the solution of the Cu-macrocycle complex, **M1**•CuI. The reaction mixture was stirred at 60 °C for 25 h, cooled to rt, and quenched via addition of  $CH_2Cl_2$  (1 mL),  $CH_3CN$  (1 mL), and KCN (50 mg in 1 mL  $H_2O$ ). After stirring overnight, the organic phase was separated, the aqueous phase extracted with  $CH_2Cl_2$  (2 × 20 mL), and the combined organic phases were washed with  $H_2O$  (10 mL) and satd aq NaCl (10 mL). The solvent was removed in vacuo and column chromatography (silica gel, hexane/EtOAc 10:1, gradient to 1:1) afforded **3•M1** (11 mg, 13%) as a yellow solid. Mp 120–122 °C (decomp).  $R_f$  = 0.33 (hexanes/EtOAc 1:1). UV-vis ( $CH_2Cl_2$ )  $\lambda_{max}$  ( $\epsilon$ ) 478 (6250), 478 (6250), 434 (14000), 438 (12200), 404 (15600), 367 (65500), 351 (83900), 332 (78100), 316 (71600), 302 (59800), 281 (68300), 272 (70900), 259 (65100) nm; UV-vis ( $CHCl_3$ )  $\lambda_{max}$  478, 438, 404, 368, 351, 331, 316, 272, 243 nm; UV-vis (toluene)  $\lambda_{max}$  478, 439, 405, 368, 352, 333, 317, 284 nm; UV-vis (THF)  $\lambda_{max}$  477, 437, 404, 365, 350, 331, 316, 271 nm; UV-vis (EtOAc)  $\lambda_{max}$  475, 436, 402, 364, 348, 331, 315, 271 nm; IR (ATR) 3039 (w), 2928 (w), 2158 (w), 2048 (w), 1592 (m), 1489 (m), 1219 (s), 1180 (m)  $cm^{-1}$ .  $^1H$  NMR (500 MHz,  $CD_2Cl_2$ )  $\delta$  8.58 (s, 4H), 8.27 (d,  $J$  = 8.3 Hz, 2H), 7.89 (d,  $J$  = 8.3 Hz, 2H), 7.79 (s, 2H), 7.75 (d,  $J$  = 8.7 Hz, 4H), 7.54–7.53 (m, 8H), 7.44–7.38 (m, 12H), 7.05 (d,  $J$  = 8.6 Hz, 4H), 7.00 (d,  $J$  = 8.6 Hz, 4H), 6.77 (d,  $J$  = 8.7 Hz, 4H), 5.20 (s, 4H).  $^{13}C$  NMR (126 MHz,  $CD_2Cl_2$ )  $\delta$  159.4, 158.3, 158.1, 149.2, 146.8, 140.6, 136.8, 136.5, 134.3, 134.2, 129.9, 129.6, 129.0, 128.9, 127.7, 127.4, 126.0, 125.2, 122.1, 120.8, 116.2, 83.2, 73.7, 70.2, 70.1, 66.5, 64.3, 61.8. APPI HRMS (MeCN/toluene) calcd for  $C_{84}H_{50}N_4O_3$  ( $M^+$ ) 1162.3877, found 1162.3873; calcd for  $C_{84}H_{51}N_4O_3$  ( $[M + H]^+$ ) 1163.3956, found 1163.3944. DSC: Mp = 124 °C; decomposition, 142 °C (onset), 186 °C (peak).



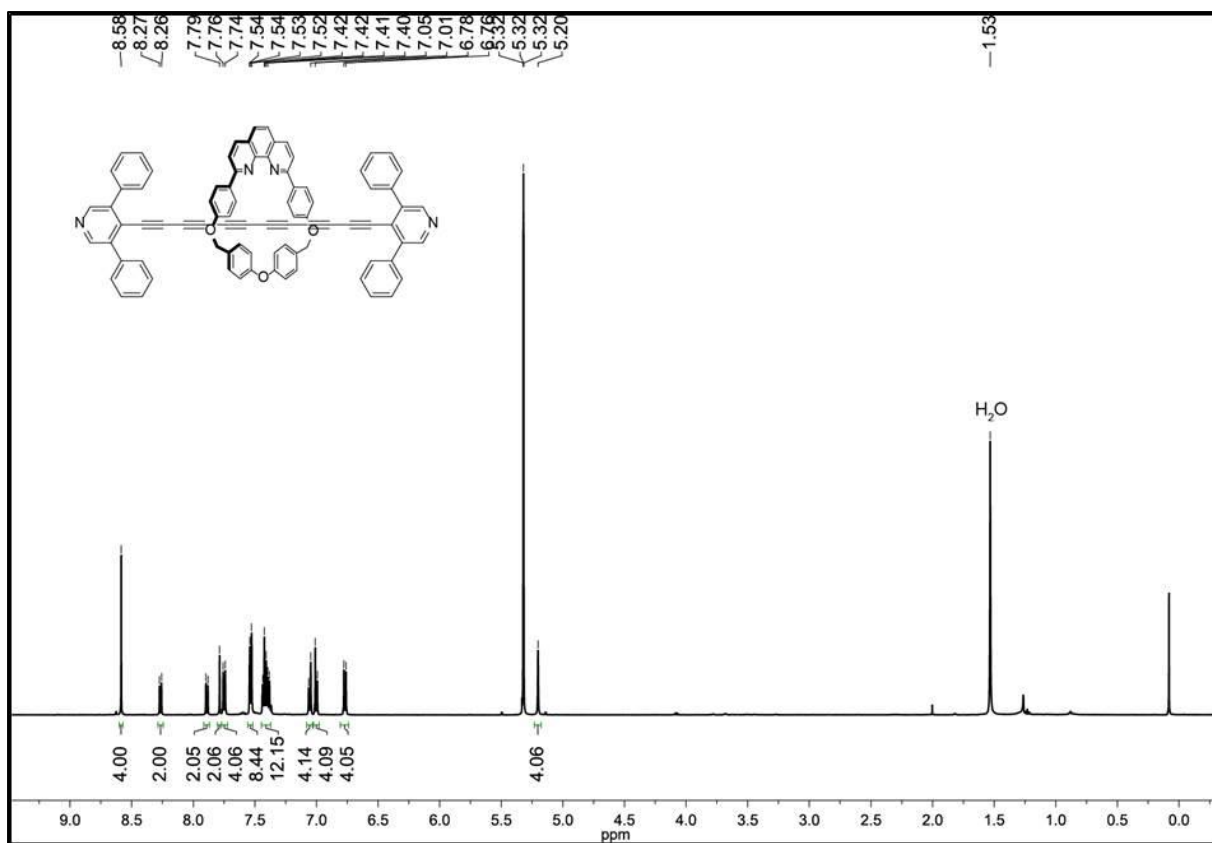

**Figure S6.** <sup>1</sup>H NMR spectrum of **3•M1** in CD<sub>2</sub>Cl<sub>2</sub> (500 MHz).

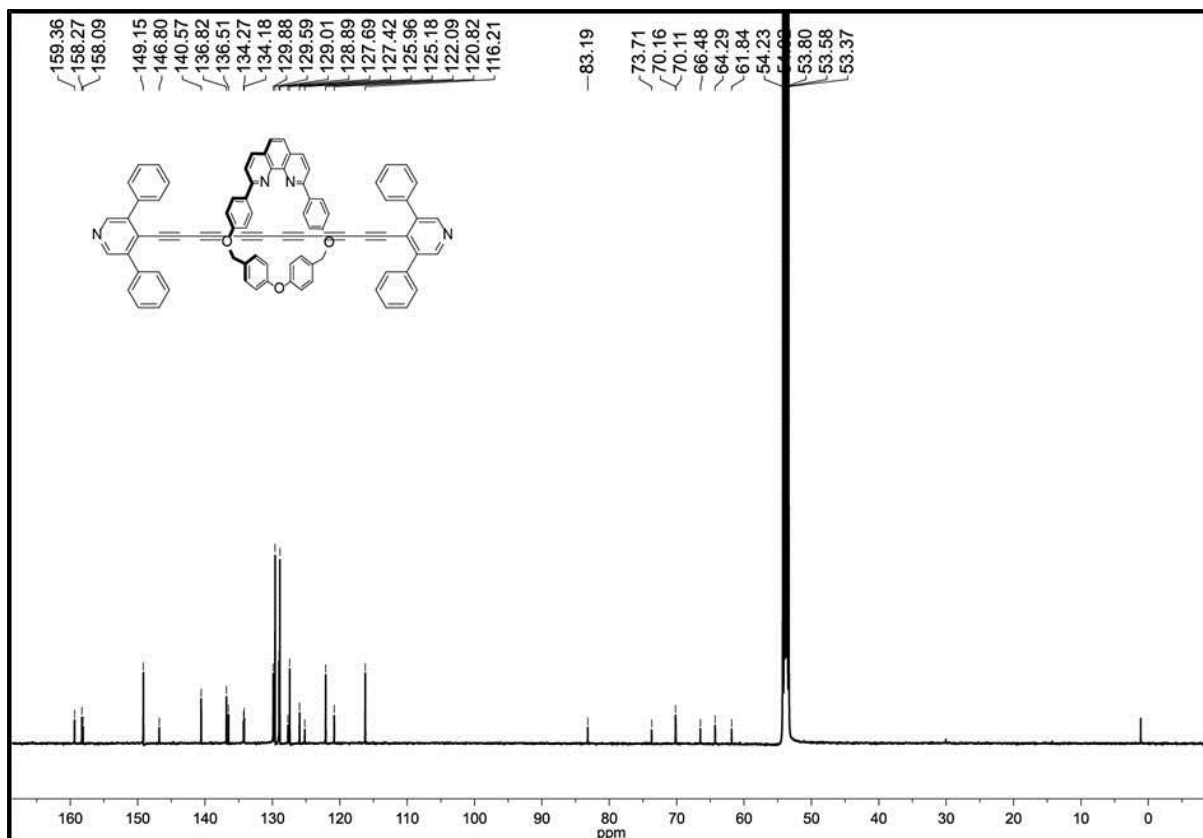

**Figure S7.** <sup>13</sup>C NMR spectrum of **3•M1** in CD<sub>2</sub>Cl<sub>2</sub> (126 MHz).

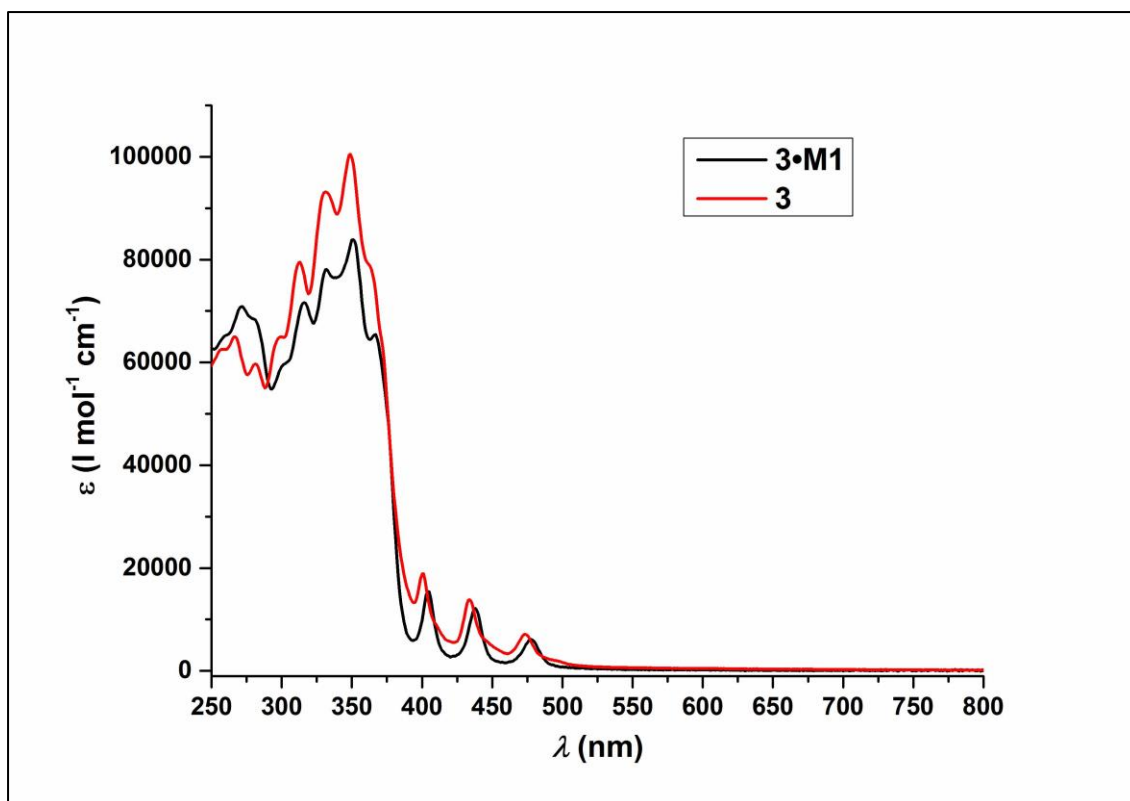

**Figure S8.** Quantitative UV-vis spectra of Dumbbell **3** and Rotaxane **3•M1** in  $\text{CH}_2\text{Cl}_2$ .

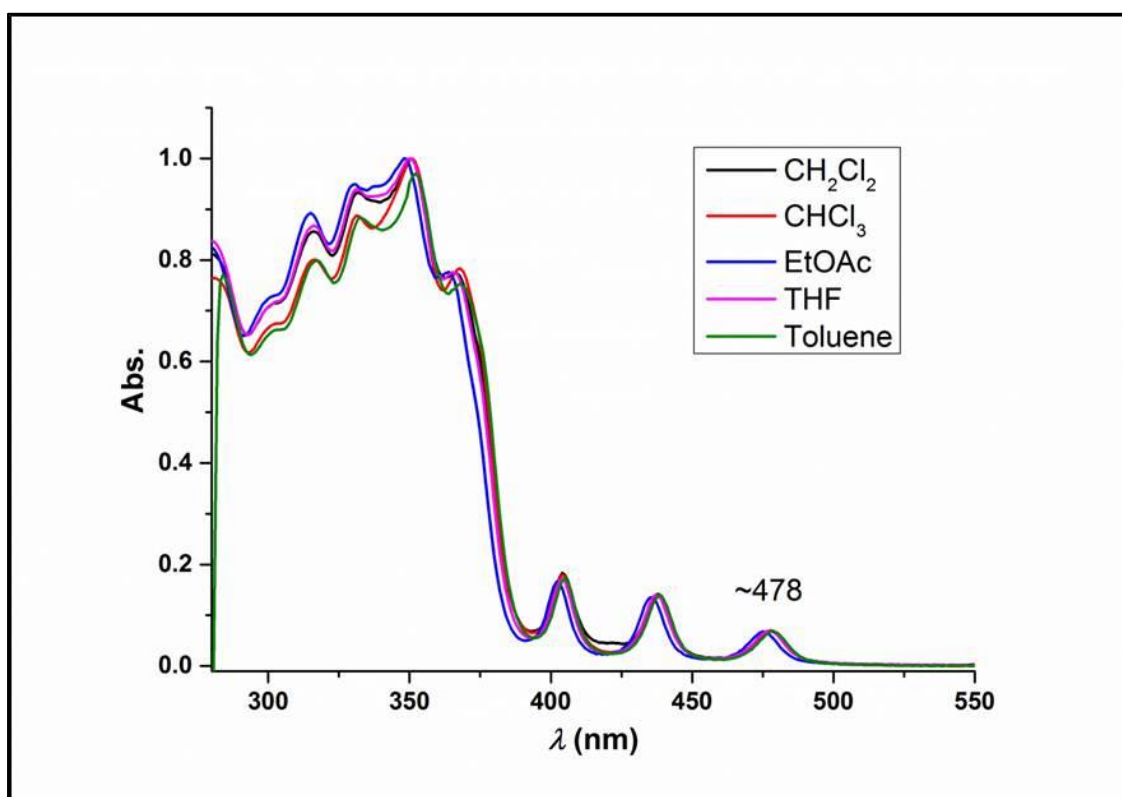

**Figure S9.** Solvent dependent UV-vis absorption spectra of Rotaxane **3•M1**.

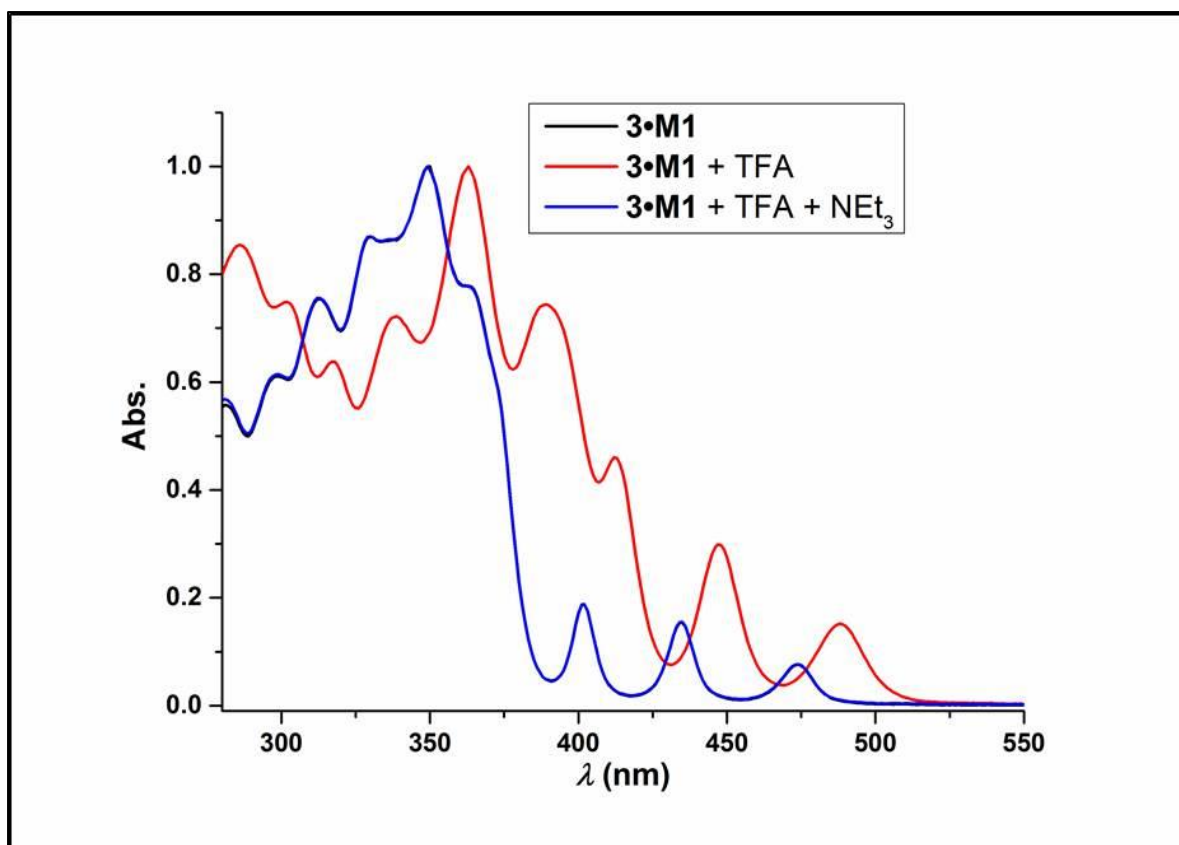

Figure S10. UV-vis absorption changes upon fully reversible protonation of rotaxane **3•M1** in  $\text{CH}_2\text{Cl}_2$ .

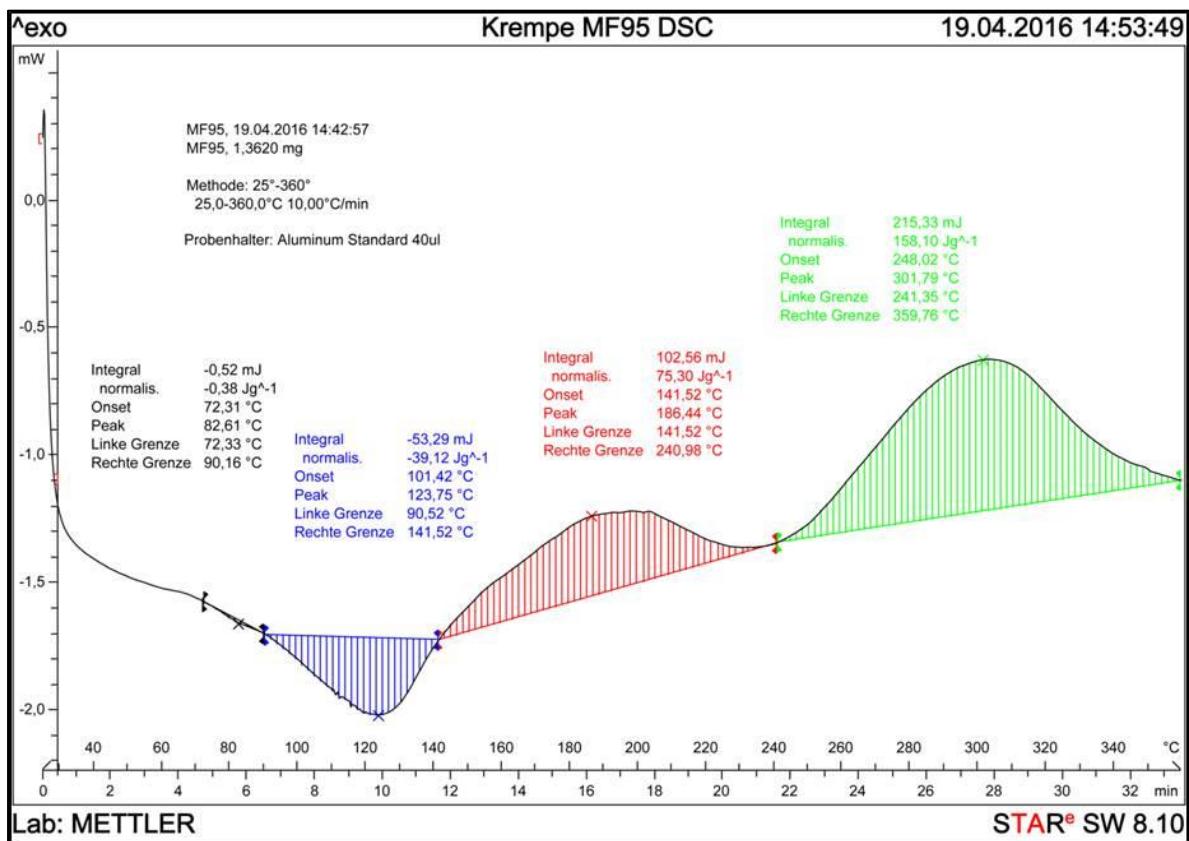

Figure S11. DSC trace of **3•M1**.

## 5. NMR spectra ( $^1\text{H}$ and $^{13}\text{C}$ ) of the naked wire, macrocycle, and rotaxane.

Figure S12 shows  $^1\text{H}$  NMR of the naked wire, macrocycle, and rotaxane and Figure S13 shows the corresponding  $^{13}\text{C}$  spectra. These confirm that the spectra of the rotaxane are linear combinations of the individual components.

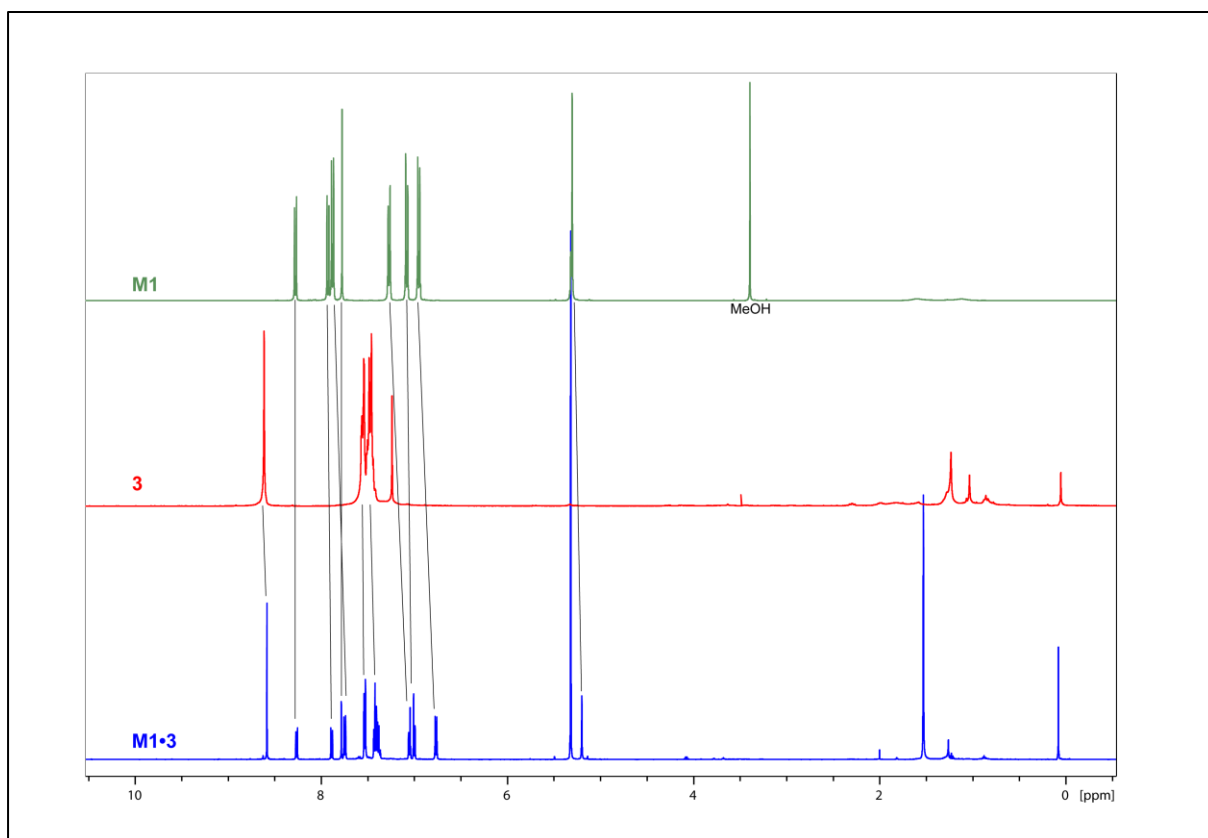

Figure S12.  $^1\text{H}$  NMR spectral comparison of M1 (green,  $\text{CD}_2\text{Cl}_2$ ), 3 (red,  $\text{CDCl}_3$ ), and M1·3 (blue,  $\text{CD}_2\text{Cl}_2$ ). Spectra of M1·3 are essentially a linear combination of the components M1 and 3.

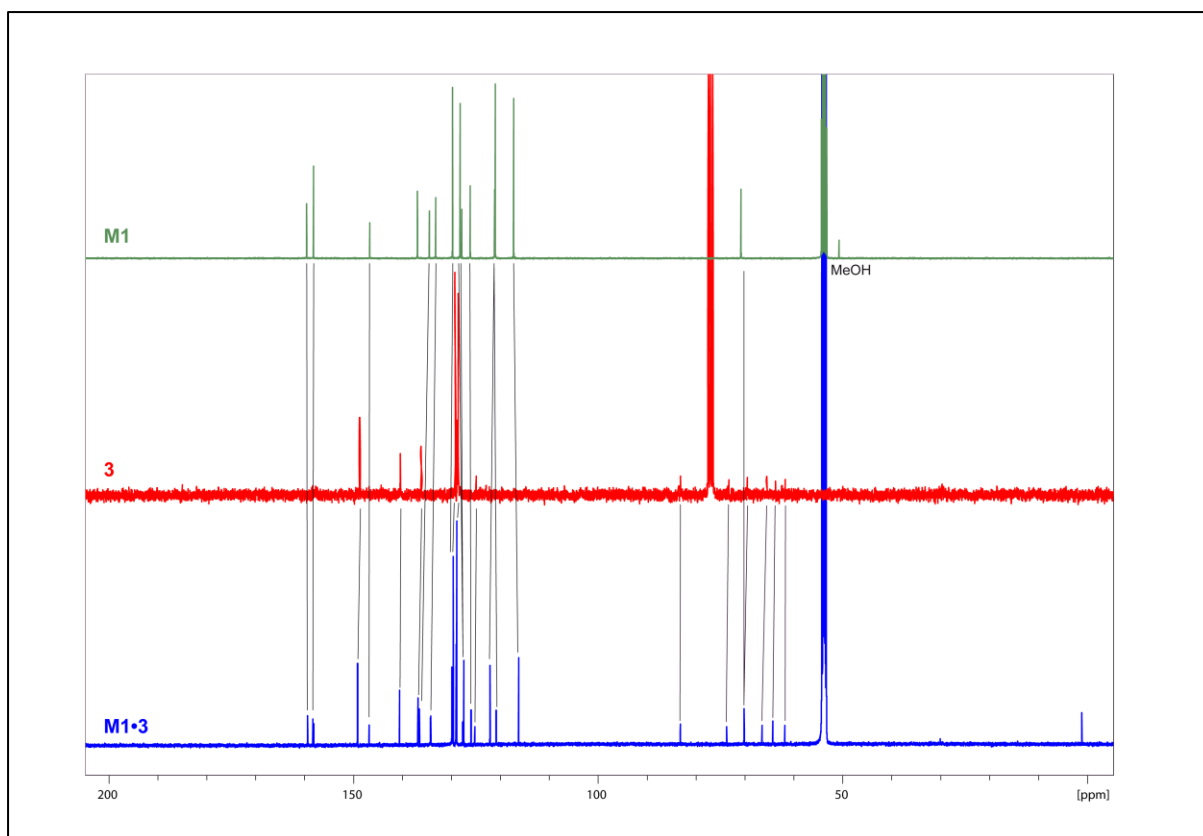

**Figure S13.**  $^{13}\text{C}$  NMR spectral comparison of M1 (green,  $\text{CD}_2\text{Cl}_2$ ), 3 (red,  $\text{CDCl}_3$ ), and M1·3 (blue,  $\text{CD}_2\text{Cl}_2$ ). Spectra of M1·3 are essentially a linear combination of the components M1 and 3.

<sup>i</sup> M. Krempe, R. Lippert, F. Hampel, I. Ivanović-Burmazović, N. Jux and R. R. Tykwinski, manuscript in preparation.

<sup>ii</sup> (a) A. M. Blanco-Rodríguez, M. Towrie, J.-P. Collin, S. Zališ and A. Vlček Jr., *Dalton Trans.*, 2009, 3941–3949. (b) M. Franz, J. A. Januszewski, D. Wendinger, C. Neiss, L. D. Movsisyan, F. Hampel, H. L. Anderson, A. Görling and R. R. Tykwinski, *Angew. Chem. Int. Ed.*, 2015, **54**, 6645. (c) L. D. Movsisyan, M. Franz, F. Hampel, A. L. Thompson, R. R. Tykwinski and H. L. Anderson, *J. Am. Chem. Soc.*, 2016, **138**, 1366–1376.

<sup>iii</sup> S. Saito, K. Nakazono and E. Takahashi, *J. Org. Chem.*, 2006, **71**, 7477–7480.
